# Supplementary material
Source: publisher site journal article supplement (https://www.e-cmh.org/upload/media/cmh-2023-0057-Supplementary-Fig-8.pdf)
Supplement: Supplementary file 1 [file cmh-2023-0057-Supplementary-Fig-8.pdf]

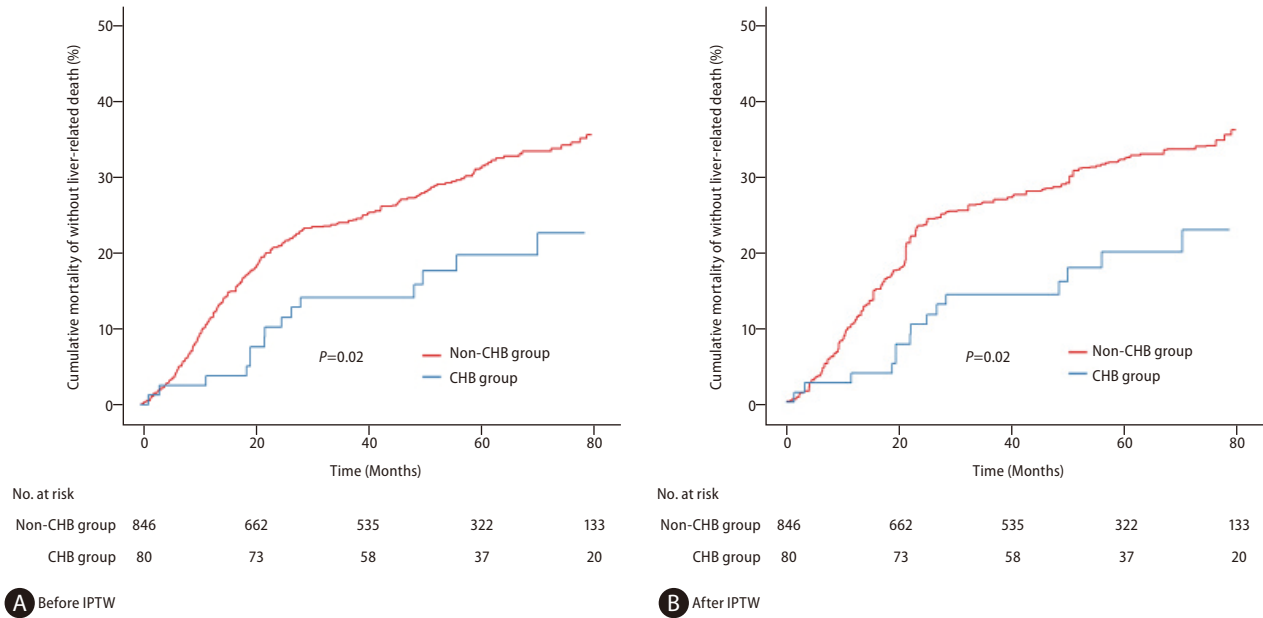

**Supplementary Figure 8.** Cumulative risk of non-liver-related death according to HBV infection status (A) before and (B) after IPTW. Propensity scores of inverse probability of treatment weighting were computed using age, sex, Ann Arbor classification, International Prognostic Index risk, germinal center B cell subtype, lactate dehydrogenase, presence of extranodal lesions, bone marrow involvement, and cirrhosis. CHB, chronic hepatitis B; HBV, hepatitis B virus.
